# Supplementary material
Source: PubMed Central journal article supplement (PMC2933337)
Supplement: mmc1.pdf [file mmc1.pdf]

**The American Journal of Human Genetics, Volume 87  
Supplemental Data**

**BOOST: A Fast Approach  
to Detecting Gene-Gene Interactions  
in Genome-wide Case-Control Studies**

**Xiang Wan, Can Yang, Qiang Yang, Hong Xue, Xiaodan Fan, Nelson L.S. Tang, and Weichuan Yu**

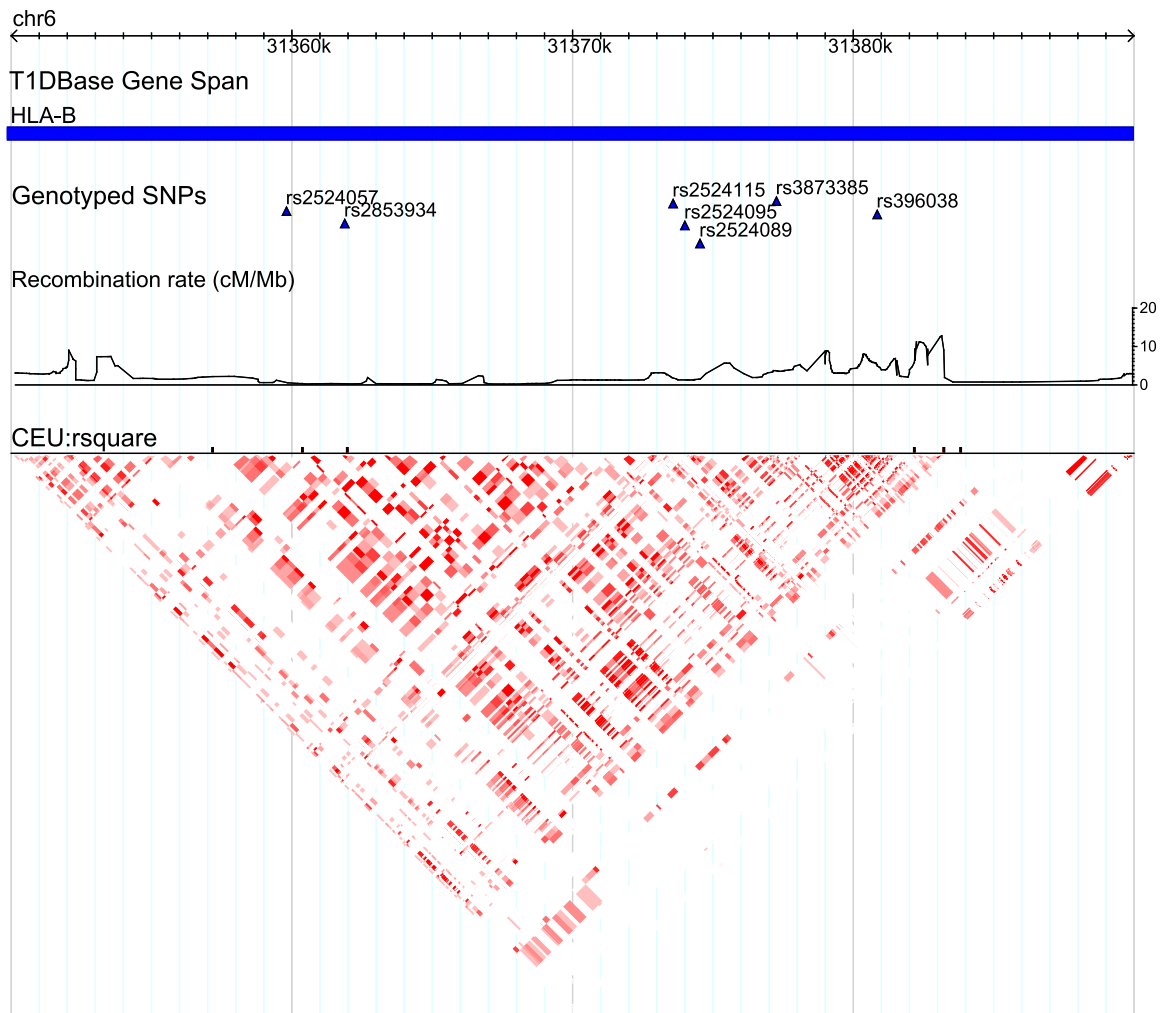

**Figure S1. The Region 31350k–31390k of Chromosome 6, Where the Gene *HLA-B* in the MHC Class I Locates**

The recombination rate and LD plot from HapMap show that a block structure spans from 31360k to 31380k. This region is mapped through the SNP rs2524057, rs2853934, rs2524115, rs396038, rs3873385, rs2524095 and rs2524089. The SNP rs2524095 and rs2524089 are involved in the interactions with the region 32930k - 32960k. The other five SNPs are involved in the interactions with the region 31360k to 31380k shown in Figure 5 of the main article.

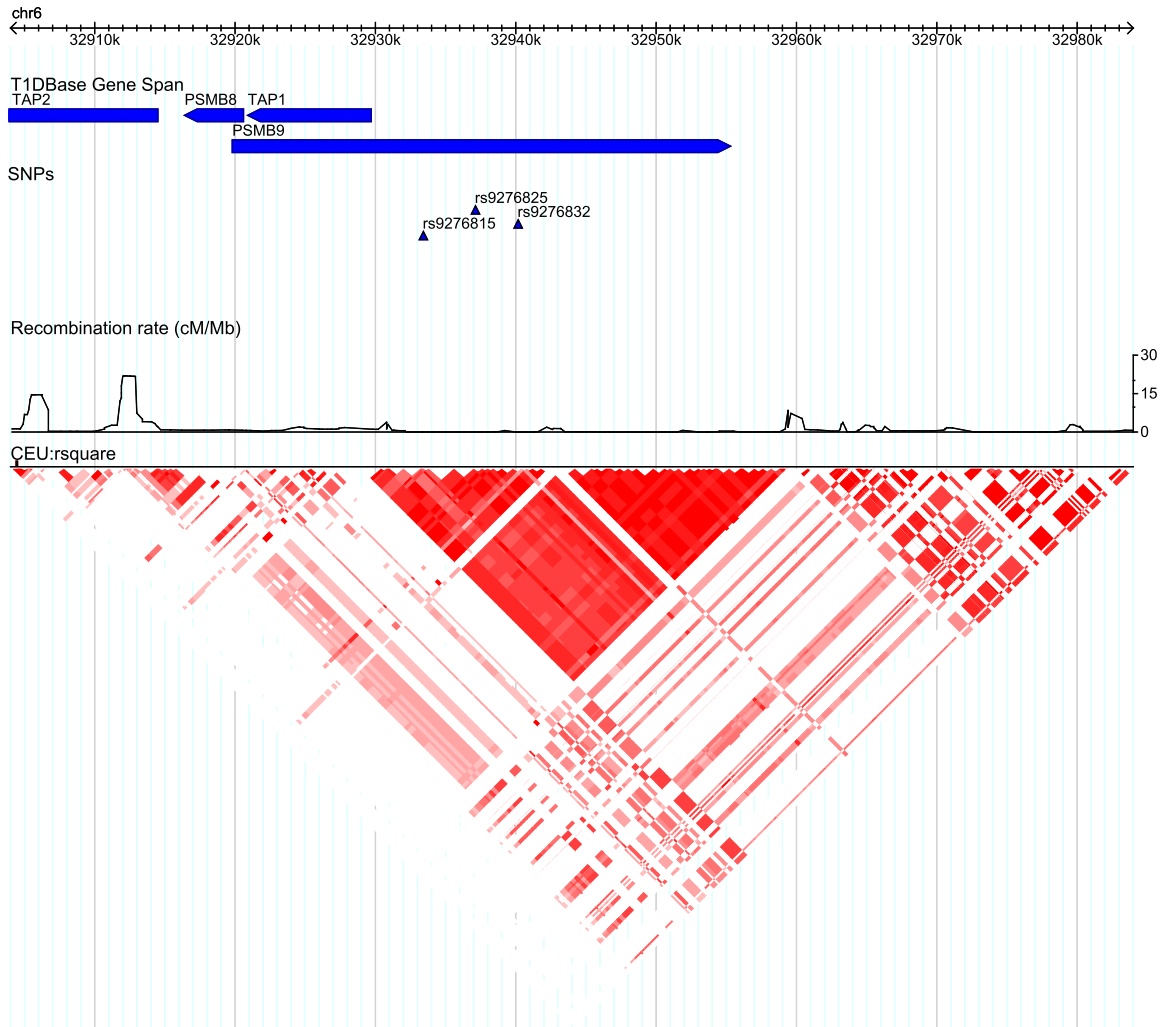

**Figure S2. The Region 32900k–32990k of Chromosome 6, Where the Genes *TAP2*, *PSMB8*, *PSMB9* and *TAP1* in the MHC Class II Reside**

The recombination rate and LD plot from HapMap show that a block structure exists from 32900k - 32990k. This region is mapped through the SNPs rs9276815, rs9276825 and rs9276832 whose single-locus  $P_{\text{values}}$  are not significant.

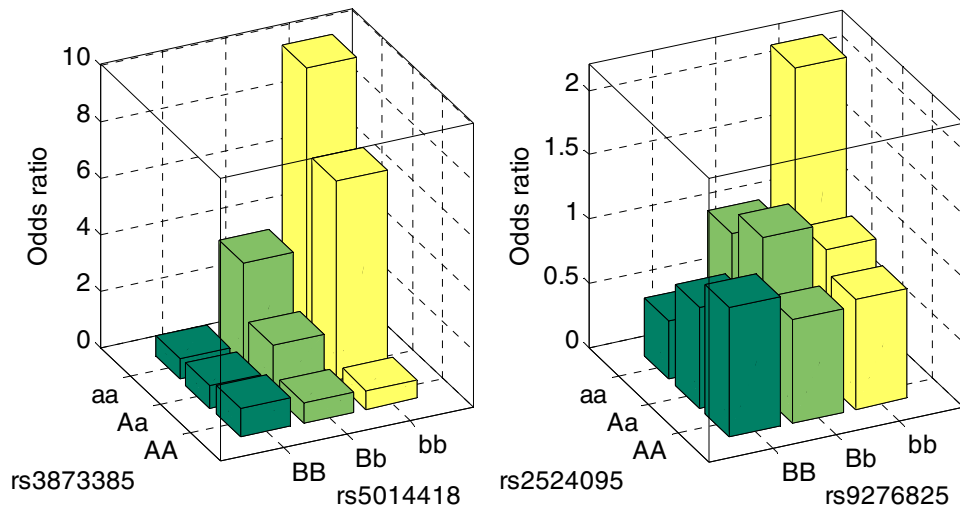

**Figure S3. Odds Ratios of the Two Interaction Groups**

Left panel: The odds ratio of the SNP pair (rs3873385, rs5014418). This odds ratio can be approximated by a multiplicative model

Right panel: The odds ratio of the SNP pair (rs2524095, rs9276825). It can be approximated by a joint recessive model.

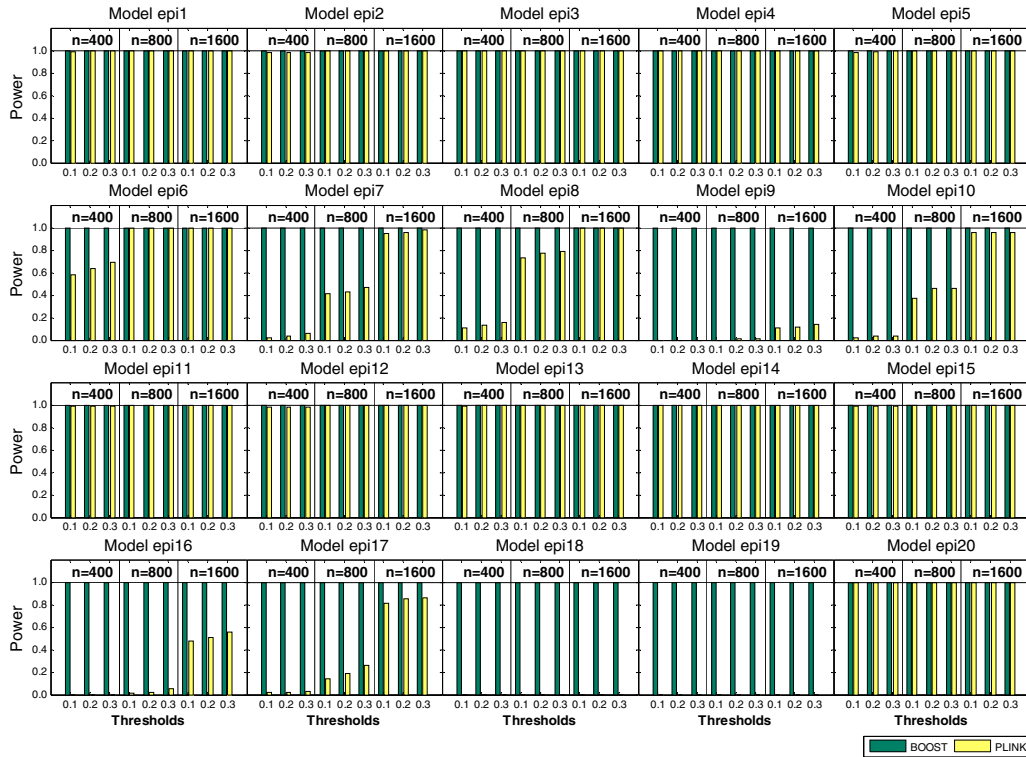

**Figure S4. The Performance Comparison between BOOST and PLINK on Models epi 1–20**

For Models epi 1-5,  $h^2 = 0.4$  and  $MAF = 0.2$ . For Models epi 6-10,  $h^2 = 0.4$  and  $MAF = 0.4$ . For Models epi 11-15,  $h^2 = 0.3$  and  $MAF = 0.2$ . For Models epi 16-20,  $h^2 = 0.3$  and  $MAF = 0.4$ . Under each parameter setting, 100 data sets are generated. In each data set, 1000 SNPs are simulated. 400, 800 and 1600 samples with balanced design are simulated. The power is calculated as the proportion of the 100 data sets in which the interactions of the disease associated SNPs are detected. The absence of bars means no power. The comparison shows that our method significantly outperforms PLINK for most of these models.

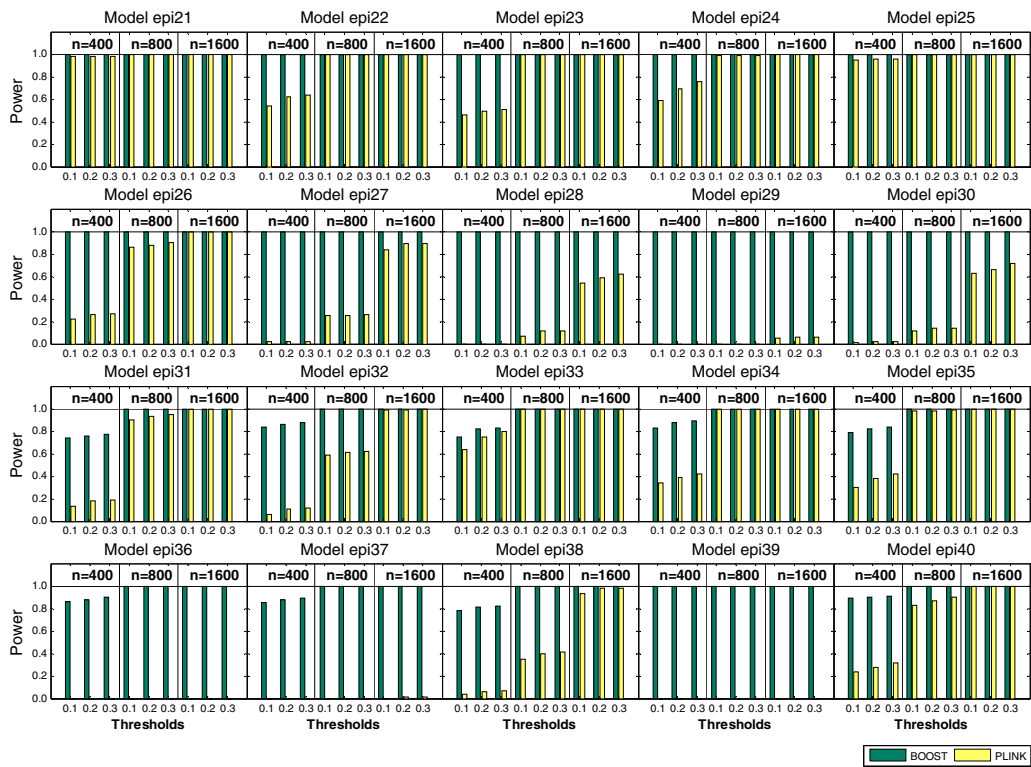

**Figure S5. The Performance Comparison between BOOST and PLINK on Models epi 21–40**

For Models epi 21-25,  $h^2 = 0.2$  and  $MAF = 0.2$ . For Models epi 26-30,  $h^2 = 0.2$  and  $MAF = 0.4$ . For Models epi 31-35,  $h^2 = 0.1$  and  $MAF = 0.2$ . For Models epi 36-40,  $h^2 = 0.1$  and  $MAF = 0.4$ . The numbers of data sets, SNPs and samples are the same as in Figure S4. The comparison shows that our method significantly outperforms PLINK for most of these models in terms of detection power.

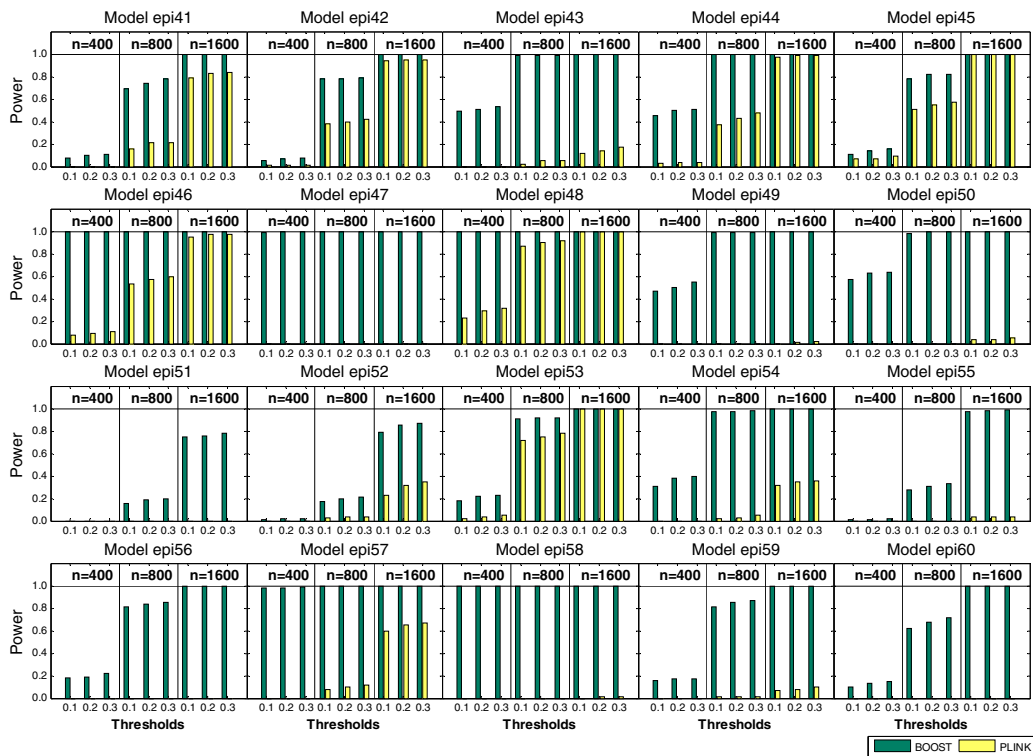

**Figure S6. The Performance Comparison between BOOST and PLINK on Models epi41–60**

For Models epi 41-45,  $h^2 = 0.05$  and  $MAF = 0.2$ . For Models epi 46-50,  $h^2 = 0.05$  and  $MAF = 0.4$ . For Models epi 51-55,  $h^2 = 0.025$  and  $MAF = 0.2$ . For Models epi 56-60,  $h^2 = 0.025$  and  $MAF = 0.4$ . The other parameters are the same as in Figure S4. Our method is superior over PLINK for most of these models.

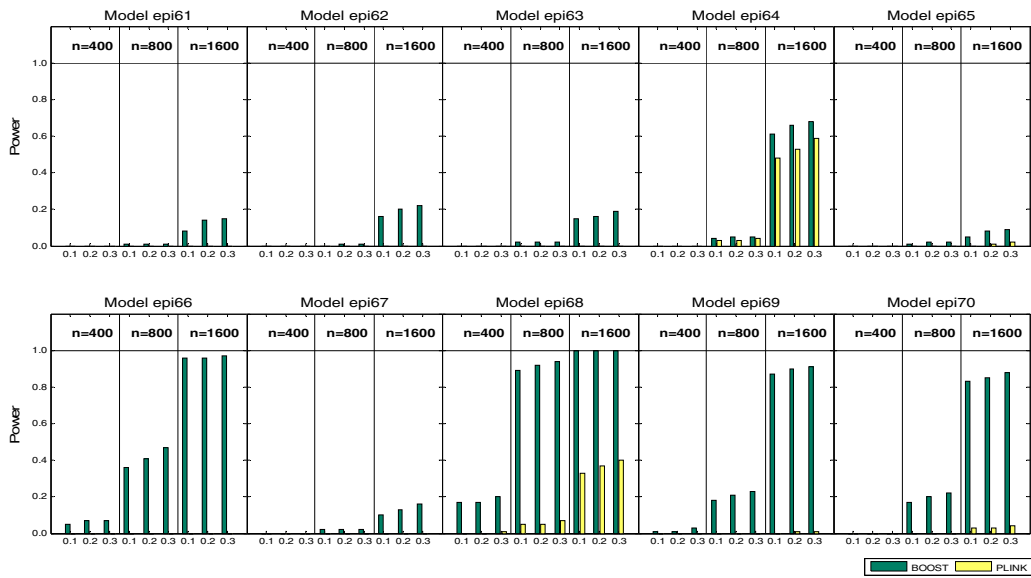

**Figure S7. The Performance Comparison between BOOST and PLINK on Models epi 61–70**

For Models epi 61-65,  $h^2 = 0.01$  and  $MAF = 0.2$ . For Models epi 66-70,  $h^2 = 0.01$  and  $MAF = 0.4$ . The other settings are the same as in Figure S4. Our method performs better than PLINK for most of these models.



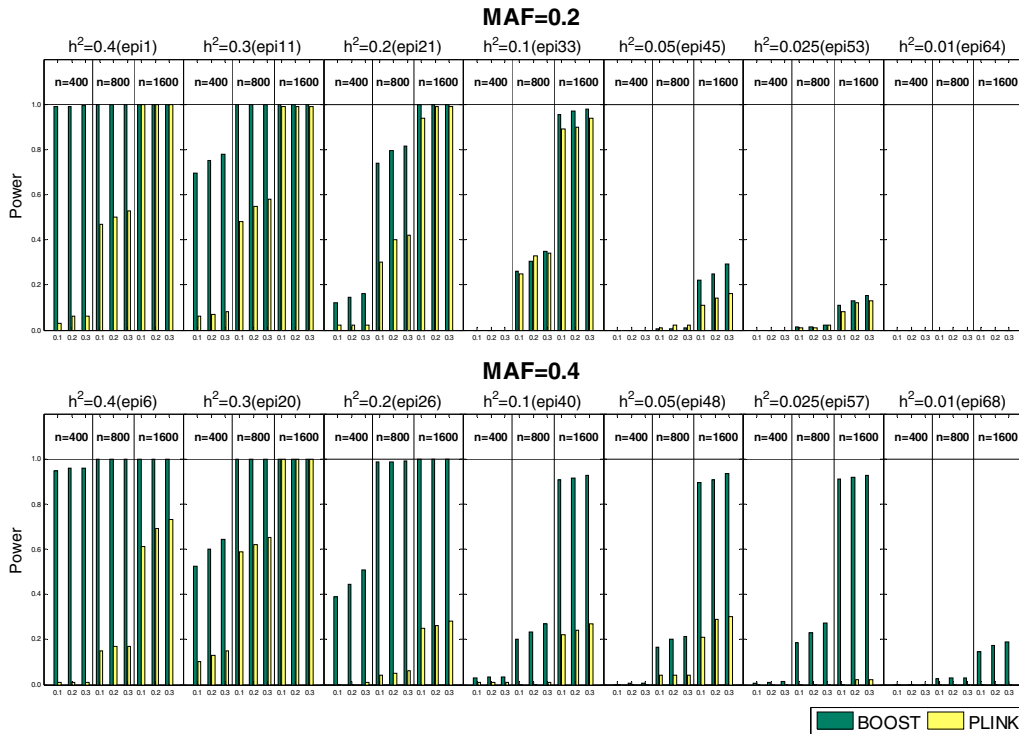

**Figure S8. The Performance of BOOST and PLINK when Genetic Heterogeneity (GH) Is Present**

The significance thresholds set as 0.1, 0.2 and 0.3 after the Bonferroni correction. We simulate 100 data sets under each model setting containing 1000 SNPs. Different sample sizes ( $n=400$ , 800 and 1600) are simulated. To simulate genetic heterogeneity, 50% case samples are generated at loci  $X_1$  and  $X_2$  and another 50% case samples are generated at loci  $X_3$  and  $X_4$ . The distribution of case samples is based on a specific disease model given in Table S6.

**Table S1. The Number of SNPs Passing Our Quality Control for the Seven Data Sets from the WTCCC**

| BD      | CAD     | CD      | HT      | RA      | T1D     | T2D     |
|---------|---------|---------|---------|---------|---------|---------|
| 352,329 | 352,890 | 355,022 | 353,559 | 353,344 | 353,397 | 352,291 |

**Table S2. The Interaction SNP Pairs in the Two Regions of Chromosome 6: The Region 31350k–31390k and the Region 32900k–32990k**

| SNP 1     |                        | SNP 2     |                        | Interaction             |
|-----------|------------------------|-----------|------------------------|-------------------------|
| SNP       | Single-locus P-value   | SNP       | Single-locus P-value   | BOOST P-value           |
| rs2524095 | $2.254 \times 10^{-2}$ | rs9276815 | $1.926 \times 10^{-1}$ | $1.443 \times 10^{-15}$ |
| rs2524095 | $2.254 \times 10^{-2}$ | rs9276825 | $1.661 \times 10^{-5}$ | $9.259 \times 10^{-14}$ |
| rs2524095 | $2.254 \times 10^{-2}$ | rs9276832 | $1.064 \times 10^{-1}$ | $1.100 \times 10^{-16}$ |
| rs2524089 | $1.796 \times 10^{-2}$ | rs9276815 | $1.926 \times 10^{-1}$ | $4.441 \times 10^{-16}$ |
| rs2524089 | $1.796 \times 10^{-2}$ | rs9276825 | $1.661 \times 10^{-5}$ | $3.364 \times 10^{-14}$ |
| rs2524089 | $1.796 \times 10^{-2}$ | rs9276832 | $1.064 \times 10^{-1}$ | $1.100 \times 10^{-16}$ |

The first region is shown in Figure S1 and the second one is shown in Figure S2. The SNPs in the column ‘SNP 1’ reside in gene *HLA-B* and the SNPs in the column ‘SNP 2’ locate at the block 32930k - 32960k where gene *PSMB9* resides. They show strong interactions without displaying significant main effects.

**Table S3. Odds Ratios for the Interactions Discussed in Table 4 in the Main Article**

| Odds ratio (95% confidence interval) of the SNP pair (rs2524057, rs9276448) |                              |                                |                                |
|-----------------------------------------------------------------------------|------------------------------|--------------------------------|--------------------------------|
|                                                                             | BB                           | Bb                             | bb                             |
| AA                                                                          | 1.000000 (1.000000-1.000000) | 0.782257 (0.630619-0.959055)   | 0.719534 (0.215448-1.482213)   |
| Aa                                                                          | 0.844810 (0.731690-0.969650) | 1.638000 (1.247961-2.088884)   | 11.805494 (2.534465-47.600259) |
| aa                                                                          | 0.679658 (0.433468-0.941995) | 7.252292 (2.998925-18.119239)  | 8.663495 (1.407606-25.296296)  |
| Odds ratio (95% confidence interval) of the SNP pair (rs2524057, rs5014418) |                              |                                |                                |
|                                                                             | BB                           | Bb                             | bb                             |
| AA                                                                          | 1.000000 (1.000000-1.000000) | 0.766093 (0.622680-0.926022)   | 0.953875 (0.317430-2.107594)   |
| Aa                                                                          | 0.848507 (0.731158-0.983871) | 1.624995 (1.218614-2.086091)   | 8.645345 (1.691003-34.470171)  |
| aa                                                                          | 0.683598 (0.458848-0.975772) | 7.358683 (2.924812-17.624191)  | 8.594120 (1.115266-26.703089)  |
| Odds ratio (95% confidence interval) of the SNP pair (rs2853934, rs9276448) |                              |                                |                                |
|                                                                             | BB                           | Bb                             | bb                             |
| AA                                                                          | 1.000000 (1.000000-1.000000) | 0.803154 (0.653206-0.990836)   | 0.829751 (0.282509-1.741118)   |
| Aa                                                                          | 0.824249 (0.712467-0.950776) | 1.713919 (1.313821-2.180228)   | 11.260651 (2.225966-42.911094) |
| aa                                                                          | 0.795271 (0.491577-1.200085) | 16.544499 (4.500612-79.974155) | 8.896769 (1.413369-25.585720)  |
| Odds ratio (95% confidence interval) of the SNP pair (rs2524115, rs9276448) |                              |                                |                                |
|                                                                             | BB                           | Bb                             | bb                             |
| AA                                                                          | 1.000000 (1.000000-1.000000) | 0.799118 (0.648489-0.966980)   | 0.974614 (0.310351-2.133718)   |
| Aa                                                                          | 0.831881 (0.715404-0.949712) | 1.742896 (1.378488-2.207660)   | 10.044209 (1.972085-38.615174) |
| aa                                                                          | 0.784986 (0.477145-1.189450) | 14.408144 (4.229527-66.857660) | 8.624214 (1.155715-26.068527)  |
| Odds ratio (95% confidence interval) of the SNP pair (rs3873385, rs9276448) |                              |                                |                                |
|                                                                             | BB                           | Bb                             | bb                             |
| AA                                                                          | 1.000000 (1.000000-1.000000) | 0.701824 (0.569175-0.858580)   | 0.761205 (0.215802-1.820555)   |
| Aa                                                                          | 0.792240 (0.681452-0.916233) | 1.782476 (1.406795-2.275316)   | 7.163968 (1.726417-35.050812)  |
| aa                                                                          | 0.753792 (0.482170-1.093480) | 3.532791 (1.808364-6.789977)   | 10.338382 (1.431955-30.044416) |
| Odds ratio (95% confidence interval) of the SNP pair (rs3873385, rs5014418) |                              |                                |                                |
|                                                                             | BB                           | Bb                             | bb                             |
| AA                                                                          | 1.000000 (1.000000-1.000000) | 0.703111 (0.563153-0.862652)   | 0.625254 (0.130193-1.486686)   |
| Aa                                                                          | 0.791486 (0.678618-0.910262) | 1.737873 (1.377238-2.153843)   | 7.039065 (1.691325-32.309307)  |
| aa                                                                          | 0.748681 (0.473684-1.058481) | 3.619657 (1.849901-7.636876)   | 10.032980 (1.462596-30.420561) |
| Odds ratio (95% confidence interval) of the SNP pair (rs3873385, rs6919798) |                              |                                |                                |
|                                                                             | BB                           | Bb                             | bb                             |
| AA                                                                          | 1.000000 (1.000000-1.000000) | 0.705275 (0.559853-0.871188)   | 0.518320 (0.066014-1.181589)   |
| Aa                                                                          | 0.817252 (0.712661-0.944343) | 1.718165 (1.309495-2.177662)   | 5.001970 (1.456140-14.881499)  |
| aa                                                                          | 0.809427 (0.532564-1.200045) | 3.097251 (1.607091-5.928819)   | 16.155510 (4.311227-30.465748) |
| Odds ratio (95% confidence interval) of the SNP pair (rs396038, rs9276448)  |                              |                                |                                |
|                                                                             | BB                           | Bb                             | bb                             |
| AA                                                                          | 1.000000 (1.000000-1.000000) | 0.804466 (0.654949-0.979859)   | 0.940362 (0.310751-2.039541)   |
| Aa                                                                          | 0.835198 (0.723344-0.955937) | 1.720432 (1.337550-2.209702)   | 9.555448 (2.006199-37.939749)  |
| aa                                                                          | 0.789622 (0.494006-1.193448) | 15.797189 (4.794310-76.848935) | 9.226793 (1.431434-28.671894)  |

Here we use “AA”, “Aa” and “aa” to denote the genotypes of the first SNP, where “A”, “a” stand for the major allele and the minor allele, respectively. We use “BB”, “Bb” and “bb” to denote the genotypes of the second SNP. The genotype combinations “Aa/Bb”, “Aa/bb”, “aa/Bb” and “aa/bb” have significantly higher disease risks than others

**Table S4. Odds Ratios for the Interactions Given in Table S2**

| Odds ratio (95% confidence interval) of the SNP pair (rs2524095, rs9276815) |                              |                              |                              |
|-----------------------------------------------------------------------------|------------------------------|------------------------------|------------------------------|
|                                                                             | BB                           | Bb                           | bb                           |
| AA                                                                          | 1.000000 (1.000000-1.000000) | 0.642590 (0.500707-0.788818) | 0.617596 (0.385972-0.892969) |
| Aa                                                                          | 0.830303 (0.669226-1.002420) | 1.117218 (0.916431-1.332502) | 0.656256 (0.490976-0.853231) |
| aa                                                                          | 0.530740 (0.386003-0.696604) | 1.017748 (0.811893-1.258269) | 1.848265 (1.279235-2.607252) |
| Odds ratio (95% confidence interval) of the SNP pair (rs2524095, rs9276825) |                              |                              |                              |
|                                                                             | BB                           | Bb                           | bb                           |
| AA                                                                          | 1.000000 (1.000000-1.000000) | 0.801326 (0.640200-0.997137) | 0.856674 (0.636023-1.127784) |
| Aa                                                                          | 0.781246 (0.614317-0.993044) | 1.219126 (0.968191-1.503457) | 1.013640 (0.789047-1.282054) |
| aa                                                                          | 0.454339 (0.309032-0.630959) | 1.024010 (0.780013-1.311447) | 2.205573 (1.570373-2.962693) |
| Odds ratio (95% confidence interval) of the SNP pair (rs2524095, rs9276832) |                              |                              |                              |
|                                                                             | BB                           | Bb                           | bb                           |
| AA                                                                          | 1.000000 (1.000000-1.000000) | 0.618815 (0.493281-0.772356) | 0.584853 (0.369357-0.849720) |
| Aa                                                                          | 0.825114 (0.681332-0.988475) | 1.142797 (0.946765-1.389668) | 0.655967 (0.489295-0.866161) |
| aa                                                                          | 0.523072 (0.388161-0.682963) | 1.079508 (0.850498-1.342980) | 1.859723 (1.270552-2.653359) |
| Odds ratio (95% confidence interval) of the SNP pair (rs2524089, rs9276815) |                              |                              |                              |
|                                                                             | BB                           | Bb                           | bb                           |
| AA                                                                          | 1.000000 (1.000000-1.000000) | 0.638618 (0.509939-0.789681) | 0.627544 (0.400878-0.895855) |
| Aa                                                                          | 0.829617 (0.679363-1.004452) | 1.132458 (0.941323-1.355327) | 0.651735 (0.475365-0.859302) |
| aa                                                                          | 0.526083 (0.380342-0.703060) | 1.005187 (0.796840-1.249330) | 1.898645 (1.306515-2.648811) |
| Odds ratio (95% confidence interval) of the SNP pair (rs2524089, rs9276825) |                              |                              |                              |
|                                                                             | BB                           | Bb                           | bb                           |
| AA                                                                          | 1.000000 (1.000000-1.000000) | 0.800233 (0.630071-0.997722) | 0.864079 (0.631823-1.141595) |
| Aa                                                                          | 0.803718 (0.620040-1.023794) | 1.229757 (0.984252-1.497876) | 1.015877 (0.789624-1.299686) |
| aa                                                                          | 0.446043 (0.303234-0.604510) | 1.021996 (0.772193-1.298333) | 2.249697 (1.612131-3.095434) |
| Odds ratio (95% confidence interval) of the SNP pair (rs2524089, rs9276832) |                              |                              |                              |
|                                                                             | BB                           | Bb                           | bb                           |
| AA                                                                          | 1.000000 (1.000000-1.000000) | 0.617008 (0.492277-0.750980) | 0.605171 (0.385295-0.868295) |
| Aa                                                                          | 0.834400 (0.692024-1.007078) | 1.143351 (0.961350-1.365511) | 0.661398 (0.479340-0.868185) |
| aa                                                                          | 0.513629 (0.382523-0.660724) | 1.079555 (0.844477-1.340670) | 1.894261 (1.277729-2.704239) |

The notation is the same as in Table S3. The genotype combination “aa/bb” has a significantly higher disease risk than the rest.

**Table S5. Simulation Models for Genetic Heterogeneity**

|         | $h^2=0.4$ | $h^2=0.3$ | $h^2=0.2$ | $h^2=0.1$ | $h^2=0.05$ | $h^2=0.025$ | $h^2=0.01$ |
|---------|-----------|-----------|-----------|-----------|------------|-------------|------------|
| MAF=0.2 | epi1      | epi11     | epi21     | epi33     | epi45      | epi53       | epi64      |
| MAF=0.4 | epi6      | epi20     | epi26     | epi40     | epi48      | epi57       | epi68      |

**Table S6. These 91 Interactions Detected by BOOST in T1D Data Display Weak Main Effects**

| SNP 1     |     |          |                      | SNP 2     |     |          |                      | Interaction   |               |
|-----------|-----|----------|----------------------|-----------|-----|----------|----------------------|---------------|---------------|
| SNP       | Chr | Position | Single-locus P-value | SNP       | Chr | Position | Single-locus P-value | BOOST P-value | PLINK P-value |
| rs1633085 | 6   | 29823976 | 6.452e-001           | rs753725  | 6   | 30998850 | 4.630e-004           | 1.068e-013    | 3.692e-011    |
| rs1737031 | 6   | 29845460 | 1.219e-001           | rs3130982 | 6   | 31192054 | 6.491e-002           | 4.863e-013    | 1.824e-012    |
| rs1610677 | 6   | 29897150 | 2.793e-001           | rs3869109 | 6   | 31292175 | 1.606e-001           | 1.676e-013    | 7.129e-012    |
| rs1611699 | 6   | 29935732 | 8.261e-001           | rs753725  | 6   | 30998850 | 4.630e-004           | 4.441e-016    | 5.529e-014    |
| rs1611710 | 6   | 29936895 | 7.948e-001           | rs753725  | 6   | 30998850 | 4.630e-004           | 4.441e-016    | 5.818e-014    |
| rs1632879 | 6   | 30025682 | 7.275e-001           | rs2523840 | 6   | 31138404 | 7.595e-001           | 3.719e-013    | 1.554e-015    |
| rs3869070 | 6   | 30131847 | 5.581e-001           | rs9266406 | 6   | 31444397 | 1.293e-006           | 4.241e-014    | 2.767e-013    |
| rs3869070 | 6   | 30131847 | 5.581e-001           | rs9266409 | 6   | 31444547 | 1.235e-006           | 2.764e-014    | 2.767e-013    |
| rs3869070 | 6   | 30131847 | 5.581e-001           | rs6910516 | 6   | 31451806 | 1.140e-006           | 6.695e-014    | 4.540e-013    |
| rs1264703 | 6   | 30173395 | 5.085e-003           | rs9267673 | 6   | 31991658 | 9.088e-006           | 3.030e-013    | 9.992e-016    |
| rs1264702 | 6   | 30173554 | 3.111e-003           | rs9267673 | 6   | 31991658 | 9.088e-006           | 2.696e-013    | 6.661e-016    |
| rs2517592 | 6   | 30201116 | 1.237e-004           | rs7452890 | 6   | 31285073 | 2.176e-004           | 6.743e-013    | 1.083e-005    |
| rs2517592 | 6   | 30201116 | 1.237e-004           | rs3130944 | 6   | 31304650 | 1.068e-006           | 5.840e-014    | 2.537e-006    |
| rs2517592 | 6   | 30201116 | 1.237e-004           | rs3130713 | 6   | 31313596 | 1.915e-006           | 1.182e-013    | 3.368e-006    |
| rs2517592 | 6   | 30201116 | 1.237e-004           | rs486416  | 6   | 31964049 | 2.425e-003           | 1.100e-016    | 2.717e-012    |
| rs2523747 | 6   | 30336917 | 3.424e-001           | rs2844615 | 6   | 31350938 | 1.413e-001           | 2.734e-013    | 7.438e-015    |
| rs2523747 | 6   | 30336917 | 3.424e-001           | rs2524057 | 6   | 31359874 | 4.807e-001           | 4.391e-013    | 3.664e-015    |
| rs2523747 | 6   | 30336917 | 3.424e-001           | rs2853934 | 6   | 31361907 | 8.336e-002           | 2.762e-013    | 8.327e-015    |
| rs2523747 | 6   | 30336917 | 3.424e-001           | rs2524051 | 6   | 31363479 | 9.983e-002           | 8.105e-014    | 3.331e-015    |
| rs2523747 | 6   | 30336917 | 3.424e-001           | rs2524132 | 6   | 31372891 | 8.827e-002           | 2.359e-013    | 7.327e-015    |
| rs2523747 | 6   | 30336917 | 3.424e-001           | rs2524115 | 6   | 31373533 | 1.215e-001           | 1.029e-013    | 3.331e-015    |
| rs2523747 | 6   | 30336917 | 3.424e-001           | rs396038  | 6   | 31380959 | 9.939e-002           | 1.961e-013    | 6.106e-015    |
| rs1264616 | 6   | 30372286 | 2.572e-001           | rs2524132 | 6   | 31372891 | 8.827e-002           | 8.626e-014    | 2.776e-015    |
| rs1264616 | 6   | 30372286 | 2.572e-001           | rs2524115 | 6   | 31373533 | 1.215e-001           | 5.873e-014    | 1.776e-015    |
| rs1264616 | 6   | 30372286 | 2.572e-001           | rs396038  | 6   | 31380959 | 9.939e-002           | 7.749e-014    | 2.220e-015    |
| rs261948  | 6   | 30378588 | 2.673e-001           | rs396038  | 6   | 31380959 | 9.939e-002           | 6.184e-014    | 1.887e-015    |
| rs6905389 | 6   | 30427909 | 8.982e-001           | rs2516486 | 6   | 31602181 | 4.689e-001           | 1.311e-013    | 2.087e-014    |
| rs2516675 | 6   | 30538499 | 2.649e-005           | rs486416  | 6   | 31964049 | 2.425e-003           | 1.511e-013    | 3.109e-015    |
| rs3131043 | 6   | 30866445 | 6.152e-001           | rs9267673 | 6   | 31991658 | 9.088e-006           | 2.220e-016    | 1.100e-016    |
| rs6931717 | 6   | 30930392 | 8.263e-006           | rs415929  | 6   | 32297010 | 9.819e-005           | 1.100e-016    | 1.100e-016    |
| rs2532921 | 6   | 31030549 | 9.694e-002           | rs9276832 | 6   | 32940378 | 1.064e-001           | 7.438e-013    | 2.655e-012    |
| rs9262546 | 6   | 31101107 | 5.351e-001           | rs427037  | 6   | 32320242 | 3.558e-002           | 1.108e-013    | 1.034e-012    |
| rs9263715 | 6   | 31203780 | 6.220e-002           | rs427037  | 6   | 32320242 | 3.558e-002           | 4.430e-014    | 3.371e-012    |
| rs9263716 | 6   | 31203795 | 6.958e-002           | rs427037  | 6   | 32320242 | 3.558e-002           | 5.018e-014    | 3.894e-012    |
| rs9263794 | 6   | 31237998 | 5.678e-001           | rs427037  | 6   | 32320242 | 3.558e-002           | 3.331e-015    | 1.554e-015    |
| rs2894180 | 6   | 31280634 | 8.230e-003           | rs427037  | 6   | 32320242 | 3.558e-002           | 1.100e-016    | 1.100e-016    |
| rs2894180 | 6   | 31280634 | 8.230e-003           | rs9276448 | 6   | 32823607 | 8.878e-003           | 1.100e-016    | 1.100e-016    |
| rs2894180 | 6   | 31280634 | 8.230e-003           | rs5014418 | 6   | 32827359 | 1.116e-002           | 1.100e-016    | 1.100e-016    |
| rs2894180 | 6   | 31280634 | 8.230e-003           | rs6919798 | 6   | 32840868 | 6.077e-002           | 1.110e-016    | 4.441e-016    |
| rs2894180 | 6   | 31280634 | 8.230e-003           | rs2621384 | 6   | 32867251 | 1.154e-004           | 1.810e-014    | 2.442e-015    |
| rs7452890 | 6   | 31285073 | 2.176e-004           | rs415929  | 6   | 32297010 | 9.819e-005           | 5.735e-013    | 8.505e-013    |
| rs3869109 | 6   | 31292175 | 1.606e-001           | rs9276832 | 6   | 32940378 | 1.064e-001           | 4.208e-014    | 9.824e-012    |
| rs3130531 | 6   | 31314595 | 6.991e-003           | rs427037  | 6   | 32320242 | 3.558e-002           | 1.110e-016    | 1.100e-016    |
| rs3130531 | 6   | 31314595 | 6.991e-003           | rs9268302 | 6   | 32432795 | 8.049e-002           | 1.100e-016    | 1.110e-016    |
| rs3130531 | 6   | 31314595 | 6.991e-003           | rs6907322 | 6   | 32432923 | 7.574e-003           | 1.100e-016    | 2.665e-015    |
| rs3095250 | 6   | 31316319 | 1.230e-004           | rs9268302 | 6   | 32432795 | 8.049e-002           | 2.591e-013    | 7.907e-012    |
| rs3095250 | 6   | 31316319 | 1.230e-004           | rs9276448 | 6   | 32823607 | 8.878e-003           | 1.554e-015    | 1.100e-016    |
| rs3095250 | 6   | 31316319 | 1.230e-004           | rs5014418 | 6   | 32827359 | 1.116e-002           | 6.661e-016    | 1.100e-016    |
| rs3095250 | 6   | 31316319 | 1.230e-004           | rs6919798 | 6   | 32840868 | 6.077e-002           | 3.220e-014    | 1.110e-016    |
| rs6937967 | 6   | 31317024 | 2.804e-005           | rs9268302 | 6   | 32432795 | 8.049e-002           | 5.851e-014    | 9.787e-012    |
| rs6937967 | 6   | 31317024 | 2.804e-005           | rs9276448 | 6   | 32823607 | 8.878e-003           | 3.275e-014    | 1.100e-016    |
| rs6937967 | 6   | 31317024 | 2.804e-005           | rs5014418 | 6   | 32827359 | 1.116e-002           | 2.176e-014    | 1.100e-016    |
| rs6937967 | 6   | 31317024 | 2.804e-005           | rs6919798 | 6   | 32840868 | 6.077e-002           | 6.474e-013    | 7.772e-016    |
| rs2524057 | 6   | 31359874 | 4.807e-001           | rs9276448 | 6   | 32823607 | 8.878e-003           | 5.362e-014    | 2.220e-016    |
| rs2524057 | 6   | 31359874 | 4.807e-001           | rs5014418 | 6   | 32827359 | 1.116e-002           | 2.738e-013    | 1.221e-015    |
| rs2853934 | 6   | 31361907 | 8.336e-002           | rs9276448 | 6   | 32823607 | 8.878e-003           | 2.507e-013    | 1.554e-015    |
| rs2524115 | 6   | 31373533 | 1.215e-001           | rs9276448 | 6   | 32823607 | 8.878e-003           | 6.456e-013    | 5.107e-015    |
| rs2524095 | 6   | 31374096 | 2.254e-002           | rs9276815 | 6   | 32933485 | 1.926e-001           | 1.443e-015    | 1.569e-011    |

| SNP 1     |     |          |                      | SNP 2     |     |          |                      | Interaction   |               |
|-----------|-----|----------|----------------------|-----------|-----|----------|----------------------|---------------|---------------|
| SNP       | Chr | Position | Single-locus P-value | SNP       | Chr | Position | Single-locus P-value | BOOST P-value | PLINK P-value |
| rs2524095 | 6   | 31374096 | 2.254e-002           | rs9276825 | 6   | 32937692 | 1.661e-005           | 9.259e-014    | 1.574e-011    |
| rs2524095 | 6   | 31374096 | 2.254e-002           | rs9276832 | 6   | 32940378 | 1.064e-001           | 1.100e-016    | 1.810e-013    |
| rs2524089 | 6   | 31374501 | 1.796e-002           | rs9276815 | 6   | 32933485 | 1.926e-001           | 4.441e-016    | 1.356e-011    |
| rs2524089 | 6   | 31374501 | 1.796e-002           | rs9276825 | 6   | 32937692 | 1.661e-005           | 3.364e-014    | 1.258e-011    |
| rs2524089 | 6   | 31374501 | 1.796e-002           | rs9276832 | 6   | 32940378 | 1.064e-001           | 1.100e-016    | 1.422e-013    |
| rs3873385 | 6   | 31377287 | 3.368e-001           | rs9276448 | 6   | 32823607 | 8.878e-003           | 3.186e-014    | 1.110e-016    |
| rs3873385 | 6   | 31377287 | 3.368e-001           | rs5014418 | 6   | 32827359 | 1.116e-002           | 3.841e-014    | 1.110e-016    |
| rs3873385 | 6   | 31377287 | 3.368e-001           | rs6919798 | 6   | 32840868 | 6.077e-002           | 4.257e-013    | 1.776e-015    |
| rs396038  | 6   | 31380959 | 9.939e-002           | rs9276448 | 6   | 32823607 | 8.878e-003           | 5.894e-013    | 4.663e-015    |
| rs3016013 | 6   | 31459221 | 6.222e-001           | rs9276448 | 6   | 32823607 | 8.878e-003           | 1.400e-013    | 6.328e-015    |
| rs3016013 | 6   | 31459221 | 6.222e-001           | rs1044043 | 6   | 32901959 | 8.631e-001           | 2.365e-014    | 3.234e-013    |
| rs3099848 | 6   | 31459421 | 5.094e-001           | rs1044043 | 6   | 32901959 | 8.631e-001           | 1.068e-013    | 3.692e-011    |
| rs2516460 | 6   | 31526679 | 3.388e-004           | rs9276448 | 6   | 32823607 | 8.878e-003           | 2.940e-013    | 2.220e-016    |
| rs2516460 | 6   | 31526679 | 3.388e-004           | rs5014418 | 6   | 32827359 | 1.116e-002           | 2.532e-013    | 4.441e-016    |
| rs2523650 | 6   | 31557001 | 2.314e-005           | rs9276227 | 6   | 32808662 | 5.975e-002           | 4.022e-013    | 2.220e-016    |
| rs2523650 | 6   | 31557001 | 2.314e-005           | rs9276299 | 6   | 32811086 | 9.175e-002           | 1.568e-013    | 1.110e-016    |
| rs2523650 | 6   | 31557001 | 2.314e-005           | rs9276448 | 6   | 32823607 | 8.878e-003           | 5.077e-013    | 4.441e-016    |
| rs9267247 | 6   | 31563813 | 2.315e-003           | rs9276448 | 6   | 32823607 | 8.878e-003           | 3.401e-013    | 1.532e-014    |
| rs2516486 | 6   | 31602181 | 4.689e-001           | rs9276227 | 6   | 32808662 | 5.975e-002           | 1.100e-016    | 1.100e-016    |
| rs2516486 | 6   | 31602181 | 4.689e-001           | rs9276299 | 6   | 32811086 | 9.175e-002           | 1.100e-016    | 1.100e-016    |
| rs2516486 | 6   | 31602181 | 4.689e-001           | rs9276448 | 6   | 32823607 | 8.878e-003           | 1.100e-016    | 1.100e-016    |
| rs2516486 | 6   | 31602181 | 4.689e-001           | rs5014418 | 6   | 32827359 | 1.116e-002           | 1.100e-016    | 1.100e-016    |
| rs2516486 | 6   | 31602181 | 4.689e-001           | rs6919798 | 6   | 32840868 | 6.077e-002           | 5.551e-016    | 1.100e-016    |
| rs2516486 | 6   | 31602181 | 4.689e-001           | rs2621384 | 6   | 32867251 | 1.154e-004           | 4.519e-014    | 1.665e-015    |
| rs2516486 | 6   | 31602181 | 4.689e-001           | rs7382347 | 6   | 32883664 | 7.856e-002           | 6.756e-013    | 3.764e-014    |
| rs2516486 | 6   | 31602181 | 4.689e-001           | rs2857129 | 6   | 32884601 | 8.365e-002           | 6.801e-013    | 3.908e-014    |
| rs2516486 | 6   | 31602181 | 4.689e-001           | rs241432  | 6   | 32910181 | 1.097e-005           | 4.508e-014    | 2.220e-016    |
| rs2844463 | 6   | 31723146 | 4.337e-006           | rs9276227 | 6   | 32808662 | 5.975e-002           | 2.665e-015    | 1.100e-016    |
| rs2844463 | 6   | 31723146 | 4.337e-006           | rs9276299 | 6   | 32811086 | 9.175e-002           | 3.775e-015    | 1.100e-016    |
| rs2844463 | 6   | 31723146 | 4.337e-006           | rs9276448 | 6   | 32823607 | 8.878e-003           | 7.772e-016    | 1.221e-015    |
| rs2844463 | 6   | 31723146 | 4.337e-006           | rs5014418 | 6   | 32827359 | 1.116e-002           | 1.110e-016    | 8.882e-016    |
| rs2844463 | 6   | 31723146 | 4.337e-006           | rs6919798 | 6   | 32840868 | 6.077e-002           | 5.551e-016    | 5.551e-016    |
| rs707937  | 6   | 31838993 | 7.815e-002           | rs6919798 | 6   | 32840868 | 6.077e-002           | 2.331e-015    | 1.654e-014    |

The P-values given in the table are unadjusted. Notice that the single-locus P-values of the SNPs listed here are not significant after the Bonferroni correction. The physical distance of the two interacting SNPs is at least 1Mb.

**Table S7. Odds Tables for Four Epistasis Models**

| Model 1 | BB       | Bb                  | Bb                    |
|---------|----------|---------------------|-----------------------|
| AA      | $\alpha$ | $\alpha$            | $\alpha$              |
| Aa      | $\alpha$ | $\alpha (1+\theta)$ | $\alpha (1+\theta)^2$ |
| aa      | $\alpha$ | $\alpha (1+\theta)$ | $\alpha (1+\theta)^4$ |

| Model 2 | BB                  | Bb                  | Bb                  |
|---------|---------------------|---------------------|---------------------|
| AA      | $\alpha$            | $\alpha (1+\theta)$ | $\alpha (1+\theta)$ |
| Aa      | $\alpha (1+\theta)$ | $\alpha$            | $\alpha$            |
| aa      | $\alpha (1+\theta)$ | $\alpha$            | $\alpha$            |

| Model 3 | BB                  | Bb                  | Bb                  |
|---------|---------------------|---------------------|---------------------|
| AA      | $\alpha$            | $\alpha$            | $\alpha (1+\theta)$ |
| Aa      | $\alpha$            | $\alpha (1+\theta)$ | $\alpha$            |
| aa      | $\alpha (1+\theta)$ | $\alpha (1+\theta)$ | $\alpha$            |

| Model 4 | BB                  | Bb                  | Bb                  |
|---------|---------------------|---------------------|---------------------|
| AA      | $\alpha$            | $\alpha (1+\theta)$ | $\alpha$            |
| Aa      | $\alpha (1+\theta)$ | $\alpha$            | $\alpha (1+\theta)$ |
| aa      | $\alpha$            | $\alpha (1+\theta)$ | $\alpha$            |

The parameters  $\alpha$  and  $\theta$  control the prevalence  $p(D)$  and the heritability  $h^2$  (see definitions in the main document).

**Table S8. Penetrance Tables for Epistasis Models with  $h^2 = 0.4$ , MAF = 0.2, 0.4**

| $h^2=0.4, \text{MAF}=0.2$ |       |       |       | $h^2=0.4, \text{MAF}=0.4$ |       |       |       |
|---------------------------|-------|-------|-------|---------------------------|-------|-------|-------|
| Model epi 1               | AA    | Aa    | aa    | Model epi 6               | AA    | Aa    | aa    |
| BB                        | 0.486 | 0.960 | 0.538 | BB                        | 0.077 | 0.656 | 0.880 |
| Bb                        | 0.947 | 0.004 | 0.811 | Bb                        | 0.892 | 0.235 | 0.312 |
| bb                        | 0.640 | 0.606 | 0.909 | bb                        | 0.174 | 0.842 | 0.106 |
| $h^2=0.4, \text{MAF}=0.2$ |       |       |       | $h^2=0.4, \text{MAF}=0.4$ |       |       |       |
| Model epi 2               | AA    | Aa    | aa    | Model epi 7               | AA    | Aa    | aa    |
| BB                        | 0.469 | 0.956 | 0.697 | BB                        | 0.895 | 0.323 | 0.161 |
| Bb                        | 0.945 | 0.019 | 0.585 | Bb                        | 0.068 | 0.728 | 0.806 |
| bb                        | 0.786 | 0.407 | 0.013 | bb                        | 0.925 | 0.233 | 0.362 |
| $h^2=0.4, \text{MAF}=0.2$ |       |       |       | $h^2=0.4, \text{MAF}=0.4$ |       |       |       |
| Model epi 3               | AA    | Aa    | aa    | Model epi 8               | AA    | Aa    | aa    |
| BB                        | 0.498 | 0.954 | 0.786 | BB                        | 0.805 | 0.251 | 0.085 |
| Bb                        | 0.978 | 0.038 | 0.428 | Bb                        | 0.002 | 0.668 | 0.638 |
| bb                        | 0.590 | 0.821 | 0.380 | bb                        | 0.830 | 0.079 | 0.542 |
| $h^2=0.4, \text{MAF}=0.2$ |       |       |       | $h^2=0.4, \text{MAF}=0.4$ |       |       |       |
| Model epi 4               | AA    | Aa    | aa    | Model epi 9               | AA    | Aa    | aa    |
| BB                        | 0.505 | 0.988 | 0.624 | BB                        | 0.307 | 0.682 | 0.958 |
| Bb                        | 0.945 | 0.085 | 0.807 | Bb                        | 0.997 | 0.390 | 0.281 |
| bb                        | 0.969 | 0.116 | 0.159 | bb                        | 0.012 | 0.990 | 0.698 |
| $h^2=0.4, \text{MAF}=0.2$ |       |       |       | $h^2=0.4, \text{MAF}=0.4$ |       |       |       |
| Model epi 5               | AA    | Aa    | aa    | Model epi 10              | AA    | Aa    | aa    |
| BB                        | 0.486 | 0.963 | 0.512 | BB                        | 0.083 | 0.891 | 0.037 |
| Bb                        | 0.941 | 0.006 | 0.899 | Bb                        | 0.619 | 0.271 | 0.691 |
| bb                        | 0.691 | 0.541 | 0.614 | bb                        | 0.853 | 0.079 | 0.742 |



**Table S9. Penetrance Tables for Epistasis Models with  $h^2 = 0.3$ , MAF = 0.2, 0.4**

|                     |       |       |       |                     |       |       |       |
|---------------------|-------|-------|-------|---------------------|-------|-------|-------|
| $h^2=0.3$ , MAF=0.2 |       |       |       | $h^2=0.3$ , MAF=0.4 |       |       |       |
| Model epi 11        | AA    | Aa    | aa    | Model epi 16        | AA    | Aa    | aa    |
| BB                  | 0.500 | 0.926 | 0.615 | BB                  | 0.891 | 0.362 | 0.480 |
| Bb                  | 0.895 | 0.131 | 0.647 | Bb                  | 0.213 | 0.829 | 0.601 |
| bb                  | 0.858 | 0.160 | 0.999 | bb                  | 0.925 | 0.267 | 0.685 |
| $h^2=0.3$ , MAF=0.2 |       |       |       | $h^2=0.3$ , MAF=0.4 |       |       |       |
| Model epi 12        | AA    | Aa    | aa    | Model epi 17        | AA    | Aa    | aa    |
| BB                  | 0.413 | 0.851 | 0.535 | BB                  | 0.077 | 0.689 | 0.417 |
| Bb                  | 0.831 | 0.008 | 0.580 | Bb                  | 0.763 | 0.150 | 0.491 |
| bb                  | 0.692 | 0.268 | 0.736 | bb                  | 0.196 | 0.657 | 0.247 |
| $h^2=0.3$ , MAF=0.2 |       |       |       | $h^2=0.3$ , MAF=0.4 |       |       |       |
| Model epi 13        | AA    | Aa    | aa    | Model epi 18        | AA    | Aa    | aa    |
| BB                  | 0.455 | 0.848 | 0.897 | BB                  | 0.132 | 0.793 | 0.274 |
| Bb                  | 0.890 | 0.088 | 0.016 | Bb                  | 0.799 | 0.213 | 0.514 |
| bb                  | 0.562 | 0.686 | 0.467 | bb                  | 0.255 | 0.528 | 0.793 |
| $h^2=0.3$ , MAF=0.2 |       |       |       | $h^2=0.3$ , MAF=0.4 |       |       |       |
| Model epi 14        | AA    | Aa    | aa    | Model epi 19        | AA    | Aa    | aa    |
| BB                  | 0.609 | 0.980 | 0.980 | BB                  | 0.611 | 0.104 | 0.759 |
| Bb                  | 0.993 | 0.300 | 0.275 | Bb                  | 0.180 | 0.674 | 0.019 |
| bb                  | 0.876 | 0.483 | 0.683 | bb                  | 0.532 | 0.189 | 0.681 |
| $h^2=0.3$ , MAF=0.2 |       |       |       | $h^2=0.3$ , MAF=0.4 |       |       |       |
| Model epi 15        | AA    | Aa    | aa    | Model epi 20        | AA    | Aa    | aa    |
| BB                  | 0.446 | 0.844 | 0.774 | BB                  | 0.091 | 0.827 | 0.863 |
| Bb                  | 0.879 | 0.044 | 0.233 | Bb                  | 0.869 | 0.393 | 0.415 |
| bb                  | 0.492 | 0.796 | 0.410 | bb                  | 0.738 | 0.508 | 0.363 |

**Table S10. Penetrance Tables for Epistasis Models with  $h^2 = 0.2$ , MAF = 0.2, 0.4**

|                     |       |       |       |                     |       |       |       |
|---------------------|-------|-------|-------|---------------------|-------|-------|-------|
| $h^2=0.2$ , MAF=0.2 |       |       |       | $h^2=0.2$ , MAF=0.4 |       |       |       |
| Model epi 21        | AA    | Aa    | aa    | Model epi 26        | AA    | Aa    | aa    |
| BB                  | 0.428 | 0.757 | 0.812 | BB                  | 0.356 | 0.891 | 0.809 |
| Bb                  | 0.788 | 0.132 | 0.044 | Bb                  | 0.955 | 0.508 | 0.611 |
| bb                  | 0.559 | 0.548 | 0.373 | bb                  | 0.617 | 0.755 | 0.630 |
| $h^2=0.2$ , MAF=0.2 |       |       |       | $h^2=0.2$ , MAF=0.4 |       |       |       |
| Model epi 22        | AA    | Aa    | aa    | Model epi 27        | AA    | Aa    | aa    |
| BB                  | 0.507 | 0.842 | 0.605 | BB                  | 0.086 | 0.536 | 0.641 |
| Bb                  | 0.845 | 0.162 | 0.629 | Bb                  | 0.677 | 0.275 | 0.096 |
| bb                  | 0.581 | 0.678 | 0.729 | bb                  | 0.219 | 0.413 | 0.712 |
| $h^2=0.2$ , MAF=0.2 |       |       |       | $h^2=0.2$ , MAF=0.4 |       |       |       |
| Model epi 23        | AA    | Aa    | aa    | Model epi 28        | AA    | Aa    | aa    |
| BB                  | 0.577 | 0.247 | 0.428 | BB                  | 0.855 | 0.339 | 0.772 |
| Bb                  | 0.227 | 0.928 | 0.578 | Bb                  | 0.513 | 0.651 | 0.607 |
| bb                  | 0.586 | 0.262 | 0.158 | bb                  | 0.250 | 0.999 | 0.154 |
| $h^2=0.2$ , MAF=0.2 |       |       |       | $h^2=0.2$ , MAF=0.4 |       |       |       |
| Model epi 24        | AA    | Aa    | aa    | Model epi 29        | AA    | Aa    | aa    |
| BB                  | 0.340 | 0.637 | 0.654 | BB                  | 0.506 | 0.838 | 0.024 |
| Bb                  | 0.689 | 0.017 | 0.041 | Bb                  | 0.603 | 0.454 | 0.957 |
| bb                  | 0.242 | 0.866 | 0.403 | bb                  | 0.729 | 0.427 | 0.753 |
| $h^2=0.2$ , MAF=0.2 |       |       |       | $h^2=0.2$ , MAF=0.4 |       |       |       |
| Model epi 25        | AA    | Aa    | aa    | Model epi 30        | AA    | Aa    | aa    |
| BB                  | 0.387 | 0.726 | 0.734 | BB                  | 0.393 | 0.764 | 0.664 |
| Bb                  | 0.749 | 0.090 | 0.034 | Bb                  | 0.850 | 0.398 | 0.733 |
| bb                  | 0.551 | 0.401 | 0.724 | bb                  | 0.406 | 0.927 | 0.147 |

**Table S11. Penetrance Tables for Epistasis Models with  $h^2 = 0.1$ , MAF = 0.2, 0.4**

|                           |       |       |       |                           |       |       |       |
|---------------------------|-------|-------|-------|---------------------------|-------|-------|-------|
| $h^2=0.1, \text{MAF}=0.2$ |       |       |       | $h^2=0.1, \text{MAF}=0.4$ |       |       |       |
| Model epi 31              | AA    | Aa    | aa    | Model epi 36              | AA    | Aa    | aa    |
| BB                        | 0.463 | 0.703 | 0.431 | BB                        | 0.137 | 0.484 | 0.187 |
| Bb                        | 0.653 | 0.277 | 0.806 | Bb                        | 0.482 | 0.166 | 0.365 |
| bb                        | 0.830 | 0.008 | 0.129 | bb                        | 0.193 | 0.361 | 0.430 |
| $h^2=0.1, \text{MAF}=0.2$ |       |       |       | $h^2=0.1, \text{MAF}=0.4$ |       |       |       |
| Model epi 32              | AA    | Aa    | aa    | Model epi 37              | AA    | Aa    | aa    |
| BB                        | 0.319 | 0.507 | 0.569 | BB                        | 0.469 | 0.198 | 0.754 |
| Bb                        | 0.553 | 0.105 | 0.045 | Bb                        | 0.337 | 0.502 | 0.141 |
| bb                        | 0.203 | 0.777 | 0.280 | bb                        | 0.339 | 0.453 | 0.285 |
| $h^2=0.1, \text{MAF}=0.2$ |       |       |       | $h^2=0.1, \text{MAF}=0.4$ |       |       |       |
| Model epi 33              | AA    | Aa    | aa    | Model epi 38              | AA    | Aa    | aa    |
| BB                        | 0.627 | 0.393 | 0.335 | BB                        | 0.478 | 0.311 | 0.864 |
| Bb                        | 0.396 | 0.779 | 0.953 | Bb                        | 0.387 | 0.579 | 0.263 |
| bb                        | 0.174 | 0.842 | 0.106 | bb                        | 0.634 | 0.436 | 0.138 |
| $h^2=0.1, \text{MAF}=0.2$ |       |       |       | $h^2=0.1, \text{MAF}=0.4$ |       |       |       |
| Model epi 34              | AA    | Aa    | aa    | Model epi 39              | AA    | Aa    | aa    |
| BB                        | 0.297 | 0.540 | 0.441 | BB                        | 0.068 | 0.299 | 0.017 |
| Bb                        | 0.541 | 0.072 | 0.278 | Bb                        | 0.289 | 0.044 | 0.285 |
| bb                        | 0.434 | 0.293 | 0.228 | bb                        | 0.048 | 0.262 | 0.174 |
| $h^2=0.1, \text{MAF}=0.2$ |       |       |       | $h^2=0.1, \text{MAF}=0.4$ |       |       |       |
| Model epi 35              | AA    | Aa    | aa    | Model epi 40              | AA    | Aa    | aa    |
| BB                        | 0.332 | 0.562 | 0.573 | BB                        | 0.539 | 0.120 | 0.258 |
| Bb                        | 0.583 | 0.112 | 0.147 | Bb                        | 0.165 | 0.378 | 0.325 |
| bb                        | 0.399 | 0.496 | 0.033 | bb                        | 0.123 | 0.426 | 0.276 |

**Table S12. Penetrance Tables for Epistasis Models with  $h^2 = 0.05$ , MAF = 0.2, 0.4**

|                      |       |       |       |                      |       |       |       |
|----------------------|-------|-------|-------|----------------------|-------|-------|-------|
| $h^2=0.05$ , MAF=0.2 |       |       |       | $h^2=0.05$ , MAF=0.4 |       |       |       |
| Model epi 41         | AA    | Aa    | aa    | Model epi 46         | AA    | Aa    | aa    |
| BB                   | 0.492 | 0.664 | 0.481 | BB                   | 0.002 | 0.155 | 0.214 |
| Bb                   | 0.642 | 0.330 | 0.746 | Bb                   | 0.199 | 0.071 | 0.022 |
| bb                   | 0.656 | 0.396 | 0.000 | bb                   | 0.081 | 0.122 | 0.135 |
| $h^2=0.05$ , MAF=0.2 |       |       |       | $h^2=0.05$ , MAF=0.4 |       |       |       |
| Model epi 42         | AA    | Aa    | aa    | Model epi 47         | AA    | Aa    | aa    |
| BB                   | 0.499 | 0.639 | 0.765 | BB                   | 0.188 | 0.020 | 0.171 |
| Bb                   | 0.666 | 0.389 | 0.083 | Bb                   | 0.032 | 0.174 | 0.059 |
| bb                   | 0.543 | 0.527 | 0.953 | bb                   | 0.134 | 0.087 | 0.092 |
| $h^2=0.05$ , MAF=0.2 |       |       |       | $h^2=0.05$ , MAF=0.4 |       |       |       |
| Model epi 43         | AA    | Aa    | aa    | Model epi 48         | AA    | Aa    | aa    |
| BB                   | 0.212 | 0.350 | 0.116 | BB                   | 0.005 | 0.179 | 0.251 |
| Bb                   | 0.336 | 0.054 | 0.495 | Bb                   | 0.211 | 0.100 | 0.026 |
| bb                   | 0.227 | 0.273 | 0.495 | bb                   | 0.156 | 0.098 | 0.156 |
| $h^2=0.05$ , MAF=0.2 |       |       |       | $h^2=0.05$ , MAF=0.4 |       |       |       |
| Model epi 44         | AA    | Aa    | aa    | Model epi 49         | AA    | Aa    | aa    |
| BB                   | 0.805 | 0.683 | 0.638 | BB                   | 0.174 | 0.321 | 0.154 |
| Bb                   | 0.657 | 0.936 | 0.989 | Bb                   | 0.223 | 0.254 | 0.245 |
| bb                   | 0.850 | 0.564 | 0.866 | bb                   | 0.448 | 0.025 | 0.424 |
| $h^2=0.05$ , MAF=0.2 |       |       |       | $h^2=0.05$ , MAF=0.4 |       |       |       |
| Model epi 45         | AA    | Aa    | aa    | Model epi 50         | AA    | Aa    | aa    |
| BB                   | 0.638 | 0.488 | 0.383 | BB                   | 0.098 | 0.219 | 0.302 |
| Bb                   | 0.464 | 0.765 | 0.957 | Bb                   | 0.302 | 0.126 | 0.121 |
| bb                   | 0.580 | 0.562 | 0.719 | bb                   | 0.053 | 0.308 | 0.136 |

**Table S13. Penetrance Tables for Epistasis Models with  $h^2 = 0.025$ , MAF = 0.2, 0.4**

|                       |       |       |       |                       |       |       |       |
|-----------------------|-------|-------|-------|-----------------------|-------|-------|-------|
| $h^2=0.025$ , MAF=0.2 |       |       |       | $h^2=0.025$ , MAF=0.4 |       |       |       |
| Model epi 51          | AA    | Aa    | aa    | Model epi 56          | AA    | Aa    | aa    |
| BB                    | 0.495 | 0.415 | 0.657 | BB                    | 0.166 | 0.165 | 0.128 |
| Bb                    | 0.429 | 0.616 | 0.121 | Bb                    | 0.114 | 0.199 | 0.143 |
| bb                    | 0.552 | 0.331 | 0.419 | bb                    | 0.281 | 0.028 | 0.281 |
| $h^2=0.025$ , MAF=0.2 |       |       |       | $h^2=0.025$ , MAF=0.4 |       |       |       |
| Model epi 52          | AA    | Aa    | aa    | Model epi 57          | AA    | Aa    | aa    |
| BB                    | 0.592 | 0.691 | 0.743 | BB                    | 0.108 | 0.006 | 0.080 |
| Bb                    | 0.712 | 0.493 | 0.419 | Bb                    | 0.026 | 0.079 | 0.046 |
| bb                    | 0.580 | 0.746 | 0.504 | bb                    | 0.021 | 0.090 | 0.025 |
| $h^2=0.025$ , MAF=0.2 |       |       |       | $h^2=0.025$ , MAF=0.4 |       |       |       |
| Model epi 53          | AA    | Aa    | aa    | Model epi 68          | AA    | Aa    | aa    |
| BB                    | 0.108 | 0.194 | 0.186 | BB                    | 0.006 | 0.094 | 0.008 |
| Bb                    | 0.196 | 0.037 | 0.045 | Bb                    | 0.079 | 0.016 | 0.076 |
| bb                    | 0.172 | 0.073 | 0.130 | bb                    | 0.052 | 0.043 | 0.057 |
| $h^2=0.025$ , MAF=0.2 |       |       |       | $h^2=0.025$ , MAF=0.4 |       |       |       |
| Model epi 54          | AA    | Aa    | aa    | Model epi 59          | AA    | Aa    | aa    |
| BB                    | 0.112 | 0.186 | 0.128 | BB                    | 0.199 | 0.072 | 0.168 |
| Bb                    | 0.193 | 0.024 | 0.138 | Bb                    | 0.086 | 0.187 | 0.076 |
| bb                    | 0.079 | 0.236 | 0.251 | bb                    | 0.125 | 0.108 | 0.226 |
| $h^2=0.025$ , MAF=0.2 |       |       |       | $h^2=0.025$ , MAF=0.4 |       |       |       |
| Model epi 55          | AA    | Aa    | aa    | Model epi 60          | AA    | Aa    | aa    |
| BB                    | 0.272 | 0.192 | 0.185 | BB                    | 0.165 | 0.096 | 0.262 |
| Bb                    | 0.172 | 0.367 | 0.390 | Bb                    | 0.166 | 0.151 | 0.091 |
| bb                    | 0.345 | 0.069 | 0.005 | bb                    | 0.050 | 0.250 | 0.056 |

**Table S14. Penetrance Tables for Epistasis Models with  $h^2 = 0.01$ , MAF = 0.2, 0.4**

|                      |       |       |       |                      |       |       |       |
|----------------------|-------|-------|-------|----------------------|-------|-------|-------|
| $h^2=0.01$ , MAF=0.2 |       |       |       | $h^2=0.01$ , MAF=0.4 |       |       |       |
| Model epi 61         | AA    | Aa    | aa    | Model epi1 66        | AA    | Aa    | aa    |
| BB                   | 0.247 | 0.301 | 0.205 | BB                   | 0.103 | 0.063 | 0.124 |
| Bb                   | 0.300 | 0.173 | 0.378 | Bb                   | 0.098 | 0.086 | 0.069 |
| bb                   | 0.215 | 0.357 | 0.268 | bb                   | 0.021 | 0.147 | 0.059 |
| $h^2=0.01$ , MAF=0.2 |       |       |       | $h^2=0.01$ , MAF=0.4 |       |       |       |
| Model epi 62         | AA    | Aa    | aa    | Model epi1 67        | AA    | Aa    | aa    |
| BB                   | 0.222 | 0.276 | 0.141 | BB                   | 0.185 | 0.291 | 0.234 |
| Bb                   | 0.259 | 0.169 | 0.401 | Bb                   | 0.286 | 0.201 | 0.277 |
| bb                   | 0.278 | 0.128 | 0.420 | bb                   | 0.249 | 0.266 | 0.166 |
| $h^2=0.01$ , MAF=0.2 |       |       |       | $h^2=0.01$ , MAF=0.4 |       |       |       |
| Model epi 63         | AA    | Aa    | aa    | Model epi1 68        | AA    | Aa    | aa    |
| BB                   | 0.260 | 0.221 | 0.201 | BB                   | 0.073 | 0.042 | 0.015 |
| Bb                   | 0.204 | 0.315 | 0.348 | Bb                   | 0.024 | 0.064 | 0.059 |
| bb                   | 0.339 | 0.074 | 0.128 | bb                   | 0.068 | 0.019 | 0.095 |
| $h^2=0.01$ , MAF=0.2 |       |       |       | $h^2=0.01$ , MAF=0.4 |       |       |       |
| Model epi 64         | AA    | Aa    | aa    | Model epi1 69        | AA    | Aa    | aa    |
| BB                   | 0.139 | 0.188 | 0.221 | BB                   | 0.046 | 0.127 | 0.069 |
| Bb                   | 0.190 | 0.111 | 0.020 | Bb                   | 0.115 | 0.067 | 0.097 |
| bb                   | 0.206 | 0.051 | 0.253 | bb                   | 0.107 | 0.069 | 0.108 |
| $h^2=0.01$ , MAF=0.2 |       |       |       | $h^2=0.01$ , MAF=0.4 |       |       |       |
| Model epi 65         | AA    | Aa    | aa    | Model epi1 70        | AA    | Aa    | aa    |
| BB                   | 0.558 | 0.616 | 0.674 | BB                   | 0.095 | 0.122 | 0.127 |
| Bb                   | 0.632 | 0.499 | 0.418 | Bb                   | 0.097 | 0.129 | 0.010 |
| bb                   | 0.546 | 0.674 | 0.395 | bb                   | 0.201 | 0.044 | 0.122 |
